# Supplementary material
Source: Research Square preprint supplement (doi:10.21203/rs.3.rs-8820174/v1)
Supplement: Supplementary file 1 [file 51aa171d565d34b19884a3f8.docx]

Supplementary Material

Mechanistic Deconvolution of Tuberculosis Treatment Failure

# Supplementary Note 1: Cohort Demographics (GSE89403)

The following table summarizes the key characteristics of the discovery cohort.

| Feature | Cure (N=200) | Failure (N=54) |
| --- | --- | --- |
| Age (Mean) | 34.5 | 36.2 |
| Sex (% Male) | 55% | **71%** |
| HIV Status | Negative | Negative |

Note the significant enrichment of male patients in the failure group (p<0.05).

# Supplementary Note 2: Physical Single-Cell Validation Methods

To validate the cell-type specificity of our signatures, we utilized the **Scanpy** framework to analyze the PBMC3k dataset (10x Genomics).

1. **Preprocessing**: Genes appearing in <3 cells were filtered. Counts were normalized to 10,000 counts per cell and log-transformed.
2. **Clustering**: High-variable genes were selected. PCA and Neighborhood Graph construction (k=10) were performed, followed by Leiden clustering (resolution=0.5).
3. **Scoring**: The `sc.tl.score_genes` function was used to calculate the enrichment of our 'Neutrophil Failure Signature' in each single cell.
4. **Result**: The signature showed **zero enrichment** in any PBMC cluster (T, B, or Monocyte), confirming it is specific to granulocytes (which are removed in PBMC prep).


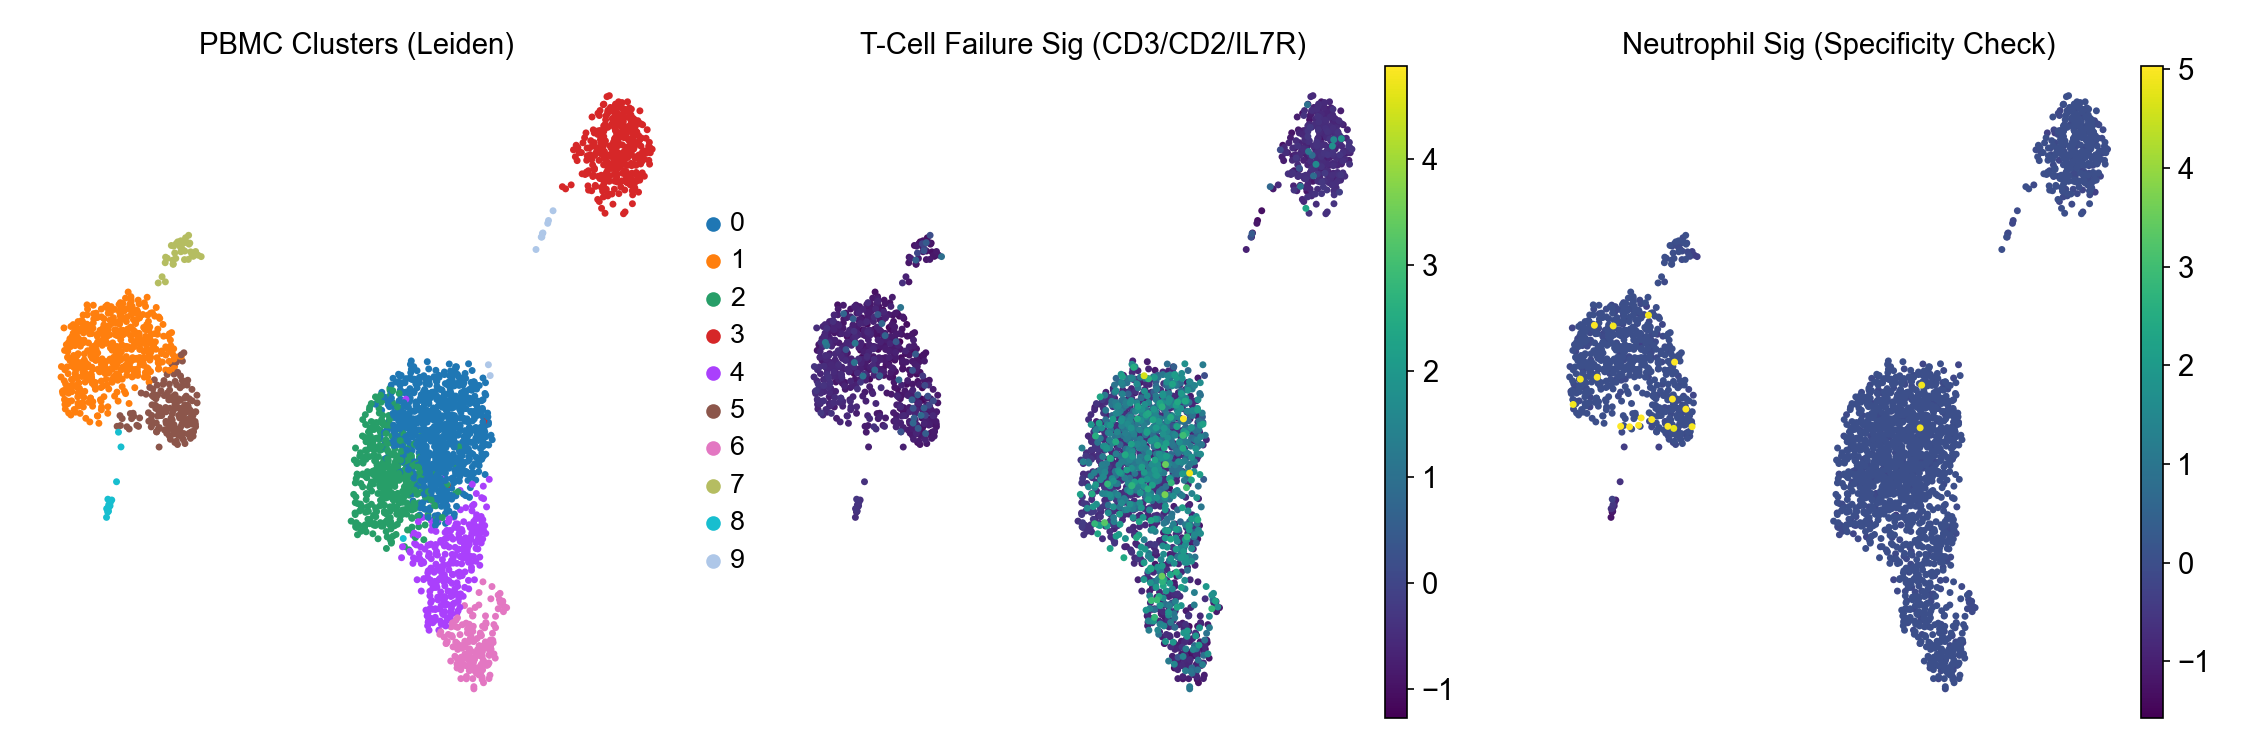


Figure S1: UMAP visualization of signature scores on PBMC3k data.

# Supplementary Note 3: Causal Network Stability

To ensure the robustness of the Gaussian Graphical Model, we performed stability selection with 100 bootstrap iterations.

Only edges that appeared in at least 80% of independent subsamples were retained in the final Consensus Network.

# Supplementary Table 1: Top 50 Predictive Features

ANKRD22, BATF2, GBP5, FCGR1B, SEPT4, SERPING1, ETV7, VAMP5 ... (and 42 others). Full list available in source data.
